# Supplementary material
Source: PubMed Central journal article supplement (PMC6231142)
Supplement: supp_RA118.004028_138239_1_supp_152925_pdvdz8.pdf [file supp_RA118.004028_138239_1_supp_152925_pdvdz8.pdf]

## Supporting information

CARM1-mediated methylation of protein arginine methyltransferase 5 represses human  $\gamma$ -globin gene expression in erythroleukemia cells

Min Nie<sup>1</sup>, Yadong Wang<sup>1</sup>, Chan Guo<sup>1</sup>, Xinyu Li<sup>1</sup>, Ying Wang<sup>1</sup>, Yexuan Deng<sup>1</sup>, Bing Yao<sup>1</sup>, Tao Gui<sup>1</sup>, Chi Ma<sup>1</sup>, Ming Liu<sup>1</sup>, Panxue Wang<sup>1</sup>, Ruoyun Wang<sup>1</sup>, Renxiang Tan<sup>1,2</sup>, Ming Fang<sup>3</sup>, Bing Chen<sup>1</sup>, Yinghong He<sup>4</sup>, David C. S. Huang<sup>5</sup>, Junyi Ju<sup>1\*</sup>, and Quan Zhao<sup>1\*</sup>

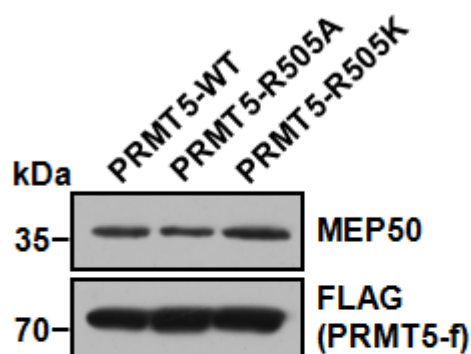

## Supplementary Fig. S1

Supplementary Figure S1. Coimmunoprecipitation of PRMT5 and MEP50 using FLAG antibody from K562 cell lysates overexpressing FLAG-tagged PRMT5-WT, PRMT5-R505A or PRMT5-R505K.

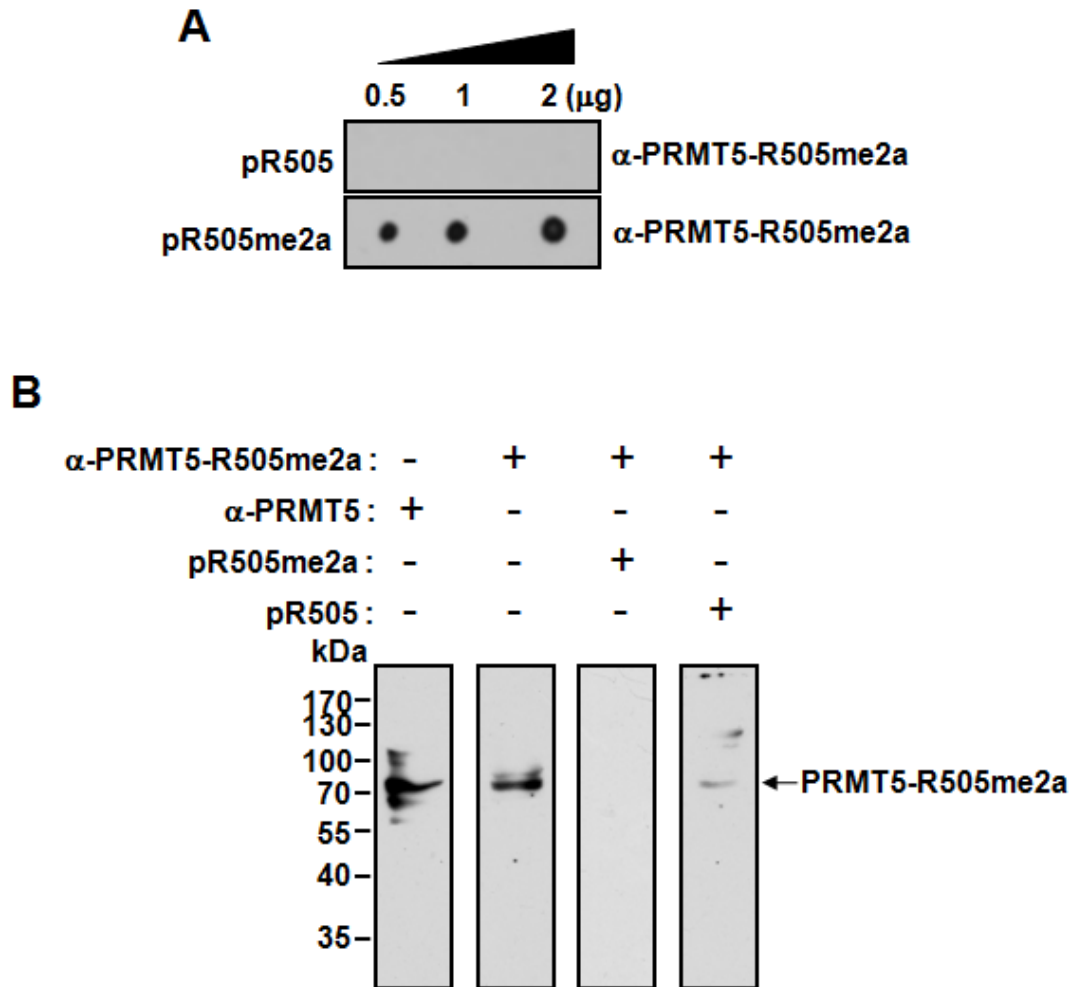

### Supplementary Fig. S2

Supplementary Figure S2. Anti-PRMT5-R505me2a antibody validation. (A) Anti-PRMT5-R505me2a antibody dot blot analysis with increasing amounts of the peptides MPYVVRLHNFH (pR505) or MPYVVVR (me2a) LHNFH (pR505me2a). (B) Western blot analysis with indicated antibodies in the presence of indicated peptides in K562 cell lysates.

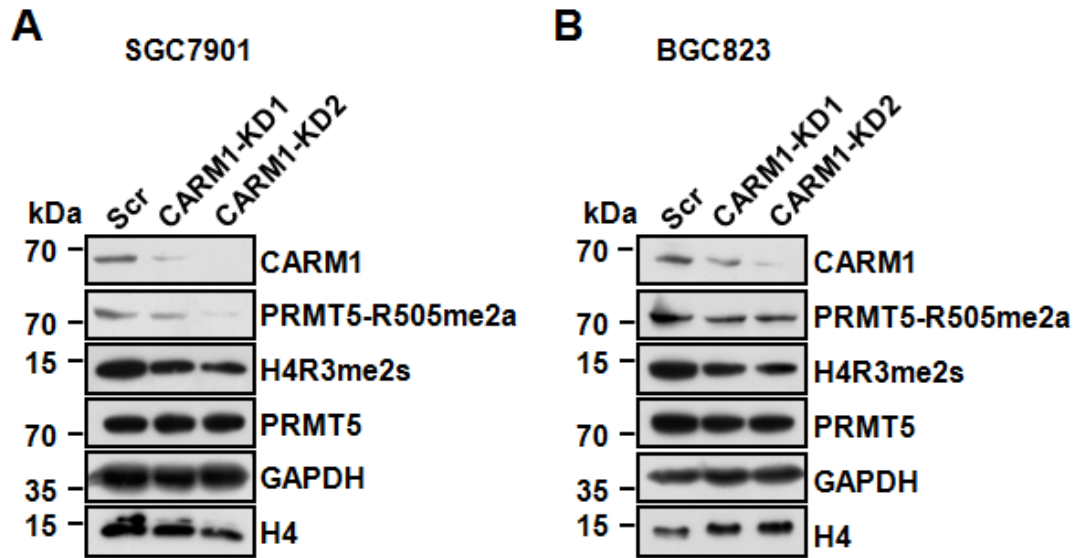

Supplementary Fig. S3

Supplementary Figure S3. CARM1 methylates PRMT5 in SGC7901 and BGC823 cells. Western blot analysis of indicated protein levels in cell lysates from the scramble control (Scr), CARM1-KD1 and CARM1-KD2 SGC7901 cells (A) and BGC823 cells (B). GAPDH and histone H4 were used as loading controls. Blots are representative of three independent experiments.

**Supplementary Table S1. Potential PRMT5-interacting proteins identified by mass spectrometry in K562 cells overexpressing PRMT5.**

| <b>Protein(s) identified</b>                                        | <b>Number of peptides identified</b> | <b>Accession Number</b> |
|---------------------------------------------------------------------|--------------------------------------|-------------------------|
| TPM3_Splice isoform2 of P06753                                      | 2<br>9% coverage                     | P06753-2                |
| KCTD2_Potassium channel tetramerisation domain containing protein 2 | 1<br>5%                              | Q14681                  |
| PP2CB_Protein phosphatase 2C beta isoform                           | 3<br>7%                              | O75688                  |
| MEP50_Methylosome protein 50 (WD-repeat protein 77)                 | 1<br>4%                              | Q9BQA1                  |
| ILF2_Interleukin enhancer-binding factor 2                          | 1<br>5%                              | Q12905                  |
| EF1A1_Elongation factor 1-alpha                                     | 4<br>9%                              | P68104                  |
| LYAR_Cell growth regulating nucleolar protein                       | 1<br>3%                              | Q9NX58                  |
| DBPA_DNA-binding protein A                                          | 1<br>4%                              | P16989                  |
| PAIRB_Plasminogen activator inhibitor 1 RNA-binding protein         | 1<br>4%                              | Q8NC51                  |
| DDX6_ATP-dependent RNA helicase DDX6                                | 1<br>3%                              | P26196                  |
| PRP19_PRP19/PSO4 homolog (Nuclear matrix protein 200)               | 1<br>2%                              | Q9UMS4                  |
| PRMT5_Protein arginine N-methyltransferase 5                        | 17<br>35%                            | O14744                  |
| PABP1_Polyadenylate-binding protein 1                               | 8<br>17%                             | P11940                  |
| HNRPM_Heterogenous nuclear ribonucleoprotein M                      | 1<br>2%                              | P52272                  |
| NUCL_Nucleolin                                                      | 2<br>4%                              | P19338                  |
| DHX9_ATP-dependent RNA helicase A                                   | 2<br>2%                              | Q08211                  |
| Q6AHX6_Hypothetical protein DKFZp686O0631                           | 2<br>2%                              | Q6AHX6                  |

**Supplementary Table S2. Q-RT-PCR primers**

| Gene             | Forward primer        | Reverse Primer          |
|------------------|-----------------------|-------------------------|
| $\gamma$ -globin | AATGTGGAAGATGCTGGA    | CTTCTTGCCATGTGCCTTGACTT |
| GAPDH            | GAAGGTGAAGGTCGGAG     | GAAGATGGTGATGGGATTTTC   |
| CARM1            | TCGCCACACCCAACGATTT   | GTACTGCACGGCAGAAGACT    |
| PRMT5            | CTGTCTTCCATCCGCGTTTCA | GCAGTAGGTCTGATCGTGTCTG  |

**Supplementary Table S3. ChIP primers**

| Promoter                  | Forward primer      | Reverse Primer         |
|---------------------------|---------------------|------------------------|
| $\gamma$ -globin promoter | ATCCAGTGAGGCCAGGGGC | GAGATTGACAAGAACAGTTTGA |
